# Supplementary material for: Biological and Socio-Cultural Factors Have the Potential to Influence the Health and Performance of Elite Female Athletes: A Cross Sectional Survey of 219 Elite Female Athletes in Aotearoa New Zealand
Source: Frontiers journal article supplement (doi:10.3389/fspor.2021.601420), 2021-02-18
Supplement: Presentation_1.PDF [file Presentation_1.PDF]

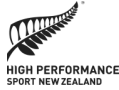

## CONSENT

**There is no obligation for you to be involved in this study. If you do not participate your normal health management and training/competition plan will be followed. If you decide to participate in the study and later feel that you no longer wish to be a part of it, you may withdraw from the study at any time without prejudice to any current or future medical treatment.**

**Your information relating to this study and any other information received will be kept strictly confidential. Your identity will not be revealed and your confidentiality will be protected in any reviews and reports of this study which may be published or shared internally with NSO's.**

**As this study involves an online survey, it is not anticipated that you will suffer any adverse effects of participating. However, if you have any concerns regarding outcomes from your participation, please contact one of the principal researchers: Dr. Stacy Sims, [ssims@waikato.ac.nz](mailto:ssims@waikato.ac.nz); AP Holly Thorpe, [holly.thorpe@waikato.ac.nz](mailto:holly.thorpe@waikato.ac.nz); and/or Dr. Bruce Hamilton, [bruce.hamilton@hpsnz.org.nz](mailto:bruce.hamilton@hpsnz.org.nz).**

**By continuing you consent to the above. Thank you.**

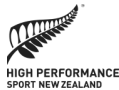

## 1. Demographic Information

1. How old are you? (years)

2. In which sport are you an athlete?

3. Discipline (where appropriate)

4. Please tick which category best describes your level of funding support

- Pathway to Podium athlete (P2P)
- Carded supported
- Non carded supported

5. Which ethnicity do you mainly identify with?

- |                                              |                                      |
|----------------------------------------------|--------------------------------------|
| <input type="radio"/> Maori                  | <input type="radio"/> Middle Eastern |
| <input type="radio"/> NZ European            | <input type="radio"/> Latin American |
| <input type="radio"/> Pacific Island         | <input type="radio"/> African        |
| <input type="radio"/> Asian                  | <input type="radio"/> Other          |
| <input type="radio"/> Other (please specify) |                                      |

6. How many years have you played competitive sport?

7. Approximately how many hours have you trained and/or competed over the last month ?

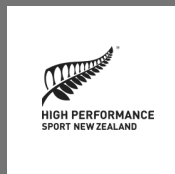

ATHLETE WINS SURVEY - WHISPA

## 2. General Medical Information

**These questions relate to your general medical history. If you have any concerns regarding the information included below, please discuss with the medical director for your sport.**

8. Do you currently take any regular prescribed medications (pills, lotions, injections)?

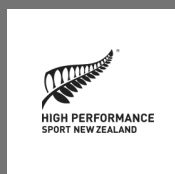

ATHLETE WINS SURVEY - WHISPA

9. Please specify what prescribed medications you take on a regular basis

- |                                                        |                                             |
|--------------------------------------------------------|---------------------------------------------|
| <input type="checkbox"/> Non steroid anti-inflammatory | <input type="checkbox"/> Asthma medication  |
| <input type="checkbox"/> Oral contraceptive            | <input type="checkbox"/> Thyroid medication |
| <input type="checkbox"/> Anti-depressant               |                                             |
| <input type="checkbox"/> Other (please specify)        |                                             |

10. Do you currently take any supplements?

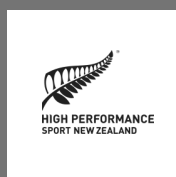

ATHLETE WINS SURVEY - WHISPA

11. Please tick all supplements you are currently taking.

- |                                                                                 |                                       |
|---------------------------------------------------------------------------------|---------------------------------------|
| <input type="checkbox"/> Creatine                                               | <input type="checkbox"/> Caffeine     |
| <input type="checkbox"/> Protein                                                | <input type="checkbox"/> Fish oil     |
| <input type="checkbox"/> Vitamins and/or minerals (including calcium/vitamin D) | <input type="checkbox"/> Beta alanine |
| <input type="checkbox"/> Oral iron supplementation                              | <input type="checkbox"/> Glucosamine  |
| <input type="checkbox"/> Probiotics                                             |                                       |
| <input type="checkbox"/> Other (please specify)                                 |                                       |

12. Have you ever been diagnosed with any of the following? (tick all that apply)

- |                                             |                                                                    |
|---------------------------------------------|--------------------------------------------------------------------|
| <input type="checkbox"/> Stress fracture(s) | <input type="checkbox"/> Concussion                                |
| <input type="checkbox"/> Disordered eating  | <input type="checkbox"/> Depression / Anxiety                      |
| <input type="checkbox"/> Asthma             | <input type="checkbox"/> Haemochromatosis (iron overload disorder) |
| <input type="checkbox"/> Low bone density   | <input type="checkbox"/> Hypothyroidism (low thyroid activity)     |
| <input type="checkbox"/> ACL rupture        | <input type="checkbox"/> Oligo/amenorrhoea (reduced/no periods)    |

13. Have you ever been diagnosed with iron deficiency and/or anaemia?

- Yes
- No

14. Have you ever used oral iron supplementation or received an iron injection or infusion?

- Yes
- No

15. Have you ever had surgery for gynaecological/women's health related issues?

- Yes
- No

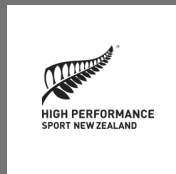

ATHLETE WINS SURVEY - WHISPA

16. What was the surgery for?

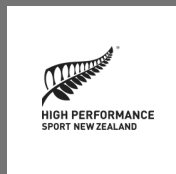

ATHLETE WINS SURVEY - WHISPA

### 3. Gynaecological Information

**These questions relate to your personal gynaecological history. If you have any concerns about any of the below we advise discussing this with the medical director for your sport.**

17. At what age did you have your first period?

18. Did your first period occur naturally? (i.e. without medical intervention)

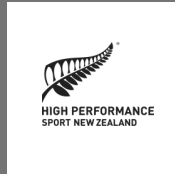

ATHLETE WINS SURVEY - WHISPA

19. What kind of treatment was used to start your menstrual cycle? (tick all that apply)

- |                                                 |                                                       |
|-------------------------------------------------|-------------------------------------------------------|
| <input type="checkbox"/> Hormonal treatment     | <input type="checkbox"/> Reduced amount of exercise   |
| <input type="checkbox"/> Weight gain            | <input type="checkbox"/> Increased nutritional intake |
| <input type="checkbox"/> Other (please specify) |                                                       |

20. Do you think that puberty was later for you than for your friends?

21. Has a doctor ever told you that you might have any of the following conditions? (tick all those that apply)

- |                                                                      |                                                                                              |
|----------------------------------------------------------------------|----------------------------------------------------------------------------------------------|
| <input type="checkbox"/> Polycystic ovary syndrome                   | <input type="checkbox"/> Female athlete triad or relative energy deficiency in sport (RED-S) |
| <input type="checkbox"/> Endometriosis                               | <input type="checkbox"/> Sexually transmitted infection                                      |
| <input type="checkbox"/> Premature ovarian failure (early menopause) | <input type="checkbox"/> None of the above                                                   |
| <input type="checkbox"/> Excess of the hormone prolactin             |                                                                                              |

Any other gynaecological diagnosis? Please specify.

22. Do you have any health concerns related to the following? (tick all that apply)

- Acne
- Unwanted hair-growth on your face, abdomen or thighs
- Milky discharge from the your breasts
- None of the above

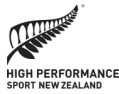

23. If you answered yes to 'milky discharge from your breasts' we recommend you make an appointment with your general practitioner or medical director for your sport.

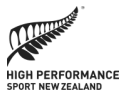

#### 4. Hormonal Contraception

**This section relates to questions about hormonal contraception. Hormonal contraception may include the oral contraceptive pill, the progesterone only pill/mini pill, the Mirena intrauterine device, the Jadelle implant and the Depo Provera injection.**

**It does not include barrier contraception such as condoms.**

24. Have you ever used hormonal contraception (for any reason)?

- Yes, and **currently** using hormonal contraception
- Yes, but **no longer** using hormonal contraception
- No, I have never used hormonal contraception

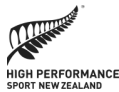

25. Which hormonal contraception are you currently using, or have you most recently used?

### Combined oral contraceptive pill

26. Why did you use the combined oral contraceptive pill? Please tick all that apply.  
(examples of combined oral contraceptive pill- Ava, Loette, Levlen, Microgynon, Microlut, Norimin, Yasmin or Yaz, Ginet or Estelle, Monofeme, Mercilon)

- |                                                     |                                                                   |
|-----------------------------------------------------|-------------------------------------------------------------------|
| <input type="checkbox"/> To make my periods regular | <input type="checkbox"/> To reduce acne                           |
| <input type="checkbox"/> To reduce period pain      | <input type="checkbox"/> Unsure; I was prescribed it by my doctor |
| <input type="checkbox"/> To try and skip my period  | <input type="checkbox"/> To prevent injury                        |
| <input type="checkbox"/> Contraception              |                                                                   |
| <input type="checkbox"/> Other (please specify)     |                                                                   |

27. How long did you or have you used it for?

- less than 3 months  
 3-6 months  
 More than 6 months

28. Did you or have you noticed any side effects from this combined oral contraceptive pill?

- |                                              |                                                  |
|----------------------------------------------|--------------------------------------------------|
| <input type="checkbox"/> Weight gain         | <input type="checkbox"/> Performance enhancement |
| <input type="checkbox"/> Weight loss         | <input type="checkbox"/> Mood disturbance        |
| <input type="checkbox"/> Heavy periods       | <input type="checkbox"/> Breast tenderness       |
| <input type="checkbox"/> Light or no periods | <input type="checkbox"/> Acne                    |
| <input type="checkbox"/> Migraines           | <input type="checkbox"/> No side effects         |
| <input type="checkbox"/> Performance deficit |                                                  |

### Progesterone only pill ('mini-pill')

29. Why did you use the Progesterone only pill / "mini-pill" (eg: Cerazette, Noriday)? (tick all that apply)

- |                                                     |                                                                   |
|-----------------------------------------------------|-------------------------------------------------------------------|
| <input type="checkbox"/> To make my periods regular | <input type="checkbox"/> To reduce acne                           |
| <input type="checkbox"/> To reduce period pain      | <input type="checkbox"/> Unsure; I was prescribed it by my doctor |
| <input type="checkbox"/> To try and skip my period  | <input type="checkbox"/> To prevent injury                        |
| <input type="checkbox"/> Contraception              |                                                                   |
| <input type="checkbox"/> Other (please specify)     |                                                                   |

30. How long did you or have you used it for?

- less than 3 months
- 3-6 months
- more than 6 months

31. Did you or have you noticed any side effects on the Progesterone only (mini) pill? (please tick all that apply)

- |                                              |                                                  |
|----------------------------------------------|--------------------------------------------------|
| <input type="checkbox"/> Weight gain         | <input type="checkbox"/> Breast tenderness       |
| <input type="checkbox"/> Weight loss         | <input type="checkbox"/> Acne                    |
| <input type="checkbox"/> Heavy periods       | <input type="checkbox"/> Performance deficit     |
| <input type="checkbox"/> Light or no periods | <input type="checkbox"/> Performance enhancement |
| <input type="checkbox"/> Migraines           | <input type="checkbox"/> No side effects         |
| <input type="checkbox"/> Mood disturbances   |                                                  |

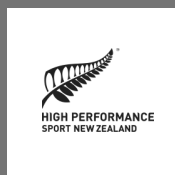

ATHLETE WINS SURVEY - WHISPA

### Hormonal intrauterine contraceptive device (eg: Mirena IUD, Jaydess IUD)



32. Why did you use this hormonal intrauterine device (IUD)? (please check all that apply)

- |                                                     |                                                                   |
|-----------------------------------------------------|-------------------------------------------------------------------|
| <input type="checkbox"/> To make my periods regular | <input type="checkbox"/> To reduce acne                           |
| <input type="checkbox"/> To try and skip my period  | <input type="checkbox"/> To prevent injury                        |
| <input type="checkbox"/> To reduce period pain      | <input type="checkbox"/> Unsure; I was prescribed it by my doctor |
| <input type="checkbox"/> Contraception              |                                                                   |
| <input type="checkbox"/> Other (please specify)     |                                                                   |

33. How long did you or have you used it for?

- less than 3 months
- 3-6 months
- more than 6 months

34. Did you or have you noticed any side effects using the hormonal IUD? (please check all that apply)

- |                                              |                                                  |
|----------------------------------------------|--------------------------------------------------|
| <input type="checkbox"/> Weight gain         | <input type="checkbox"/> Breast tenderness       |
| <input type="checkbox"/> Weight loss         | <input type="checkbox"/> Acne                    |
| <input type="checkbox"/> Heavy periods       | <input type="checkbox"/> Performance deficit     |
| <input type="checkbox"/> Light or no periods | <input type="checkbox"/> Performance enhancement |
| <input type="checkbox"/> Mood disturbances   | <input type="checkbox"/> No side effects         |

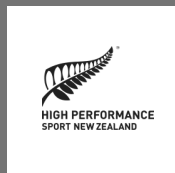

ATHLETE WINS SURVEY - WHISPA

**Depot injection.**

35. Why did you use the Depot injection?

- |                                                     |                                                                   |
|-----------------------------------------------------|-------------------------------------------------------------------|
| <input type="checkbox"/> To make my periods regular | <input type="checkbox"/> To reduce acne                           |
| <input type="checkbox"/> To try and skip my periods | <input type="checkbox"/> To prevent injury                        |
| <input type="checkbox"/> To reduce period pain      | <input type="checkbox"/> Unsure; I was prescribed it by my doctor |
| <input type="checkbox"/> Contraception              |                                                                   |
| <input type="checkbox"/> Other (please specify)     |                                                                   |

36. How long did you, or have you used it for?

- less than 3 months
- 3-6 months
- more than 6 months

37. Did you/have you noticed any side effects using the Depo Injection?

- |                                              |                                                  |
|----------------------------------------------|--------------------------------------------------|
| <input type="checkbox"/> Weight gain         | <input type="checkbox"/> Breast tenderness       |
| <input type="checkbox"/> Weight loss         | <input type="checkbox"/> Acne                    |
| <input type="checkbox"/> Heavy periods       | <input type="checkbox"/> Performance enhancement |
| <input type="checkbox"/> Light or no periods | <input type="checkbox"/> Performance deficit     |
| <input type="checkbox"/> Mood disturbance    | <input type="checkbox"/> No side effects         |



ATHLETE WINS SURVEY - WHISPA

**Jadelle implant**

38. Why did you use this Jadelle implant? (small implant under the skin)

- |                                                     |                                                                   |
|-----------------------------------------------------|-------------------------------------------------------------------|
| <input type="checkbox"/> To make my periods regular | <input type="checkbox"/> To improve acne                          |
| <input type="checkbox"/> To reduce period pain      | <input type="checkbox"/> To prevent injury                        |
| <input type="checkbox"/> To try and skip my period  | <input type="checkbox"/> Unsure; I was prescribed it by my doctor |
| <input type="checkbox"/> Contraception              |                                                                   |
| <input type="checkbox"/> Other (please specify)     |                                                                   |

39. How long did you, or have you used it for?

- less than 3 months  more than 6 months
- 3-6 months
- Other (please specify)

40. What side effects did you experience with the Jadelle implant?

- |                                              |                                                  |
|----------------------------------------------|--------------------------------------------------|
| <input type="checkbox"/> Weight gain         | <input type="checkbox"/> Breast tenderness       |
| <input type="checkbox"/> Weight loss         | <input type="checkbox"/> Acne                    |
| <input type="checkbox"/> Heavy periods       | <input type="checkbox"/> Performance enhancement |
| <input type="checkbox"/> Light or no periods | <input type="checkbox"/> Performance deficit     |
| <input type="checkbox"/> Mood disturbance    | <input type="checkbox"/> No side effects         |

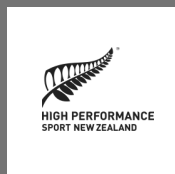

ATHLETE WINS SURVEY - WHISPA

## Menstrual Cycle

**These questions relate to your menstrual cycle.**

41. How many periods have you had in the last twelve months?

42. Do you track your own menstrual cycle?

- Yes
- No

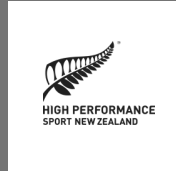

ATHLETE WINS SURVEY - WHISPA

43. How do you record your menstrual cycle?

- Training Software
- Paper or electronic diary
- Other (please specify)
- Smart phone App

44. How useful do you find your method for tracking your cycle?

Not useful at all Extremely useful

45. When you don't use hormonal contraception are your periods regular? (21 -35 days)

- Yes
- No
- Don't know
- I have never used a form of hormonal contraception

46. Relating to your menstrual cycle do you experience any of the following symptoms? (Please check all that apply)

- |                                                                             |                                                       |
|-----------------------------------------------------------------------------|-------------------------------------------------------|
| <input type="checkbox"/> Pelvic pain (pain in the lower part of your belly) | <input type="checkbox"/> Pain in upper legs or thighs |
| <input type="checkbox"/> Pain when opening your bowels                      | <input type="checkbox"/> Nausea or vomiting           |
| <input type="checkbox"/> Bleeding when opening your bowels                  | <input type="checkbox"/> Increased fatigue            |
| <input type="checkbox"/> Pain on passing urine                              | <input type="checkbox"/> Disrupted sleep              |
| <input type="checkbox"/> Blood in your urine                                | <input type="checkbox"/> Headaches                    |
| <input type="checkbox"/> Low back pain                                      | <input type="checkbox"/> None of these                |
| <input type="checkbox"/> Deep pelvic pain during sex                        |                                                       |

Other (please specify)

47. Do you take pain relief during your period?

48. Do you consider your periods to be heavy?

- Yes  
 No

49. During your period do you regularly (tick all that apply)

- |                                                                                     |                                                                                            |
|-------------------------------------------------------------------------------------|--------------------------------------------------------------------------------------------|
| <input type="checkbox"/> Pass large blood clots                                     | <input type="checkbox"/> Needing to wear double sanitary protection                        |
| <input type="checkbox"/> Flood through your protection to clothes or bedding        | <input type="checkbox"/> Struggle to complete training session without changing protection |
| <input type="checkbox"/> Needing to very frequently change sanitary pads or tampons | <input type="checkbox"/> None of these                                                     |

50. When your training volume, intensity or duration changes do you experience changes in your menstrual cycle?

- Yes  
 No  
 Don't know

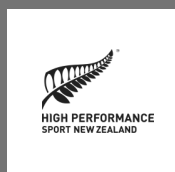

51. What specific changes in your menstrual cycle do you notice when you reduce training volume, intensity or duration?

- |                                                 |                                                           |
|-------------------------------------------------|-----------------------------------------------------------|
| <input type="checkbox"/> I bleed less           | <input type="checkbox"/> My bleeding stops                |
| <input type="checkbox"/> I bleed more           | <input type="checkbox"/> My monthly cycle is more regular |
| <input type="checkbox"/> I bleed fewer days     | <input type="checkbox"/> My monthly cycle is less regular |
| <input type="checkbox"/> I bleed more days      |                                                           |
| <input type="checkbox"/> Other (please specify) |                                                           |

52. In the last six months have you missed or modified any **training** due to menstrual cycle related symptoms?

- Yes  
 No

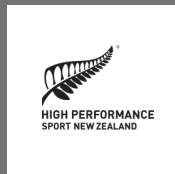

ATHLETE WINS SURVEY - WHISPA

53. How many times in the last six months have you had to miss or modify a training session due to menstrual cycle related symptoms?

54. Relating to your menstrual cycle what symptoms have caused you to miss or modify training? (please tick all that apply)

- |                                                    |                                             |
|----------------------------------------------------|---------------------------------------------|
| <input type="checkbox"/> Heavy bleeding            | <input type="checkbox"/> Body aches         |
| <input type="checkbox"/> Severe pain or cramps     | <input type="checkbox"/> Low mood           |
| <input type="checkbox"/> Fatigue                   | <input type="checkbox"/> Lack of motivation |
| <input type="checkbox"/> Nausea or vomiting        | <input type="checkbox"/> Headache           |
| <input type="checkbox"/> Diarrhoea or constipation |                                             |
| <input type="checkbox"/> Other (please specify)    |                                             |

55. In the last four years (Olympic cycle) have you missed a **competition** due to menstrual cycle related symptoms?

Yes

No

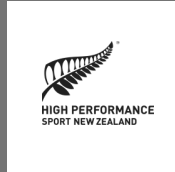

## ATHLETE WINS SURVEY - WHISPA

56. What menstrual cycle related symptoms have prevented you from competing? (please tick all that apply)

Heavy bleeding

Body aches

Severe period pain or cramping

Low mood

Fatigue

Lack of motivation

Nausea or vomiting

Headaches

Diarrhoea or constipation

Other (please specify)

57. In the last four years do you believe menstrual cycle related symptoms have impacted your performance? (tick all that apply)

Yes, I go better when I have my period

Yes, I go worse when I am ovulating

Yes, I go worse when I have my period

I am not sure

Yes, I got better when I am ovulating

No, it doesn't seem to affect my performance

58. Do you, or have you, used medication to prevent menstruation during a competition?

Yes

No



## ATHLETE WINS SURVEY - WHISPA

59. What medication have you used?

60. Which of the following best reflects *your beliefs* about having a period whilst competing?

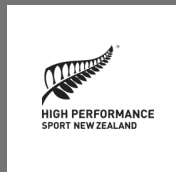

ATHLETE WINS SURVEY - WHISPA

## 6. PRESSURE IN SPORT

This section relates to particular concerns relating to pressure that may affect women in elite sport.

61. Do you feel there are ***appearance-related*** pressures to look a particular way in your sport?

- Yes  
 No  
 Not sure

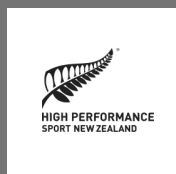

ATHLETE WINS SURVEY - WHISPA

62. What are the sources of this pressure? (please check all that apply)

- |                                  |                                              |
|----------------------------------|----------------------------------------------|
| <input type="checkbox"/> Self    | <input type="checkbox"/> Social media        |
| <input type="checkbox"/> Coach   | <input type="checkbox"/> Sports Organisation |
| <input type="checkbox"/> Peers   | <input type="checkbox"/> Public              |
| <input type="checkbox"/> Parents | <input type="checkbox"/> Support staff       |
| <input type="checkbox"/> Media   | <input type="checkbox"/> Other               |



63. Can you please explain what these pressures are?

64. Do you feel there are **performance-related** pressures to look a particular way in your sport?

- Yes
- No
- Not sure

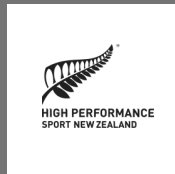

ATHLETE WINS SURVEY - WHISPA

65. What are the sources of the pressures? (please check all that apply)

- |                                  |                                             |
|----------------------------------|---------------------------------------------|
| <input type="checkbox"/> Self    | <input type="checkbox"/> Social media       |
| <input type="checkbox"/> Coach   | <input type="checkbox"/> Sports organisaton |
| <input type="checkbox"/> Peers   | <input type="checkbox"/> Public             |
| <input type="checkbox"/> Parents | <input type="checkbox"/> Support Staff      |
| <input type="checkbox"/> Media   | <input type="checkbox"/> Other              |

66. Can you please explain what these pressures are?

67. Do you feel conflict between the ideal body for performance in your sport (e.g. muscular, being lean) and broader concepts around femininity?

- Yes
- No
- Not sure

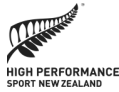

68. Please explain more about this conflict you experience.

69. Do you feel the culture of your sport in **New Zealand** puts pressure on female athletes to look a particular way that may be damaging to women's health?

Yes

No



70. Please comment on how the culture of your sport in **New Zealand** puts pressure on female athletes to look a particular way that may be damaging to women's health?

71. Have you used any of the following to try to obtain the "ideal" body for performance or appearance reasons? (please tick all that apply)

Dieting or very restrictive nutrition practices

Vomiting or purging

Training on rest days

Use of medication or supplements

Use of laxatives

Other (please specify)

72. Do you discuss menstrual cycle related issues with your coach?

- Yes
- No

73. Has a coach (past or present) ever encouraged you to lose weight for performance reasons?

- Yes
- No

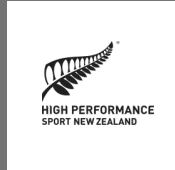

ATHLETE WINS SURVEY - WHISPA

74. If yes, how did this comment make you feel? (please tick all that apply)

- |                                                 |                                                 |
|-------------------------------------------------|-------------------------------------------------|
| <input type="checkbox"/> Motivated              | <input type="checkbox"/> Angry                  |
| <input type="checkbox"/> Demotivated            | <input type="checkbox"/> Unhappy with your body |
| <input type="checkbox"/> Confused               | <input type="checkbox"/> No emotional response  |
| <input type="checkbox"/> Upset                  |                                                 |
| <input type="checkbox"/> Other (please specify) |                                                 |

75. Do you experience any barriers communicating menstrual-related issues with support staff?

- Yes
- No

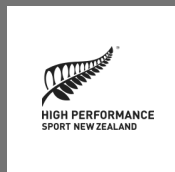

ATHLETE WINS SURVEY - WHISPA

76. Specifically do you experience barriers with (tick all that apply)

- |                                                  |                                                          |
|--------------------------------------------------|----------------------------------------------------------|
| <input type="checkbox"/> Female coach            | <input type="checkbox"/> Female doctor                   |
| <input type="checkbox"/> Male coach              | <input type="checkbox"/> Male doctor                     |
| <input type="checkbox"/> Female sports scientist | <input type="checkbox"/> Female strength and conditioner |
| <input type="checkbox"/> Male sports scientist   | <input type="checkbox"/> Male strength and conditioner   |
| <input type="checkbox"/> Female nutritionist     | <input type="checkbox"/> Male physiotherapist            |
| <input type="checkbox"/> Male nutritionist       | <input type="checkbox"/> Female physiotherapist          |

77. What do you perceive are the barriers?

- |                                                                  |                                                                                                                                                  |
|------------------------------------------------------------------|--------------------------------------------------------------------------------------------------------------------------------------------------|
| <input type="checkbox"/> Gender of staff                         | <input type="checkbox"/> Concerns about the nature of the conversation impacting your position in sport/team (e.g. deselection from competition) |
| <input type="checkbox"/> Lack of staff knowledge of these issues | <input type="checkbox"/> Cultural differences between yourself and staff                                                                         |
| <input type="checkbox"/> Stigma of this topic                    | <input type="checkbox"/> Other                                                                                                                   |

Other (please specify)

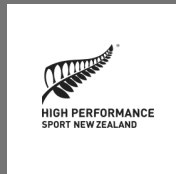

ATHLETE WINS SURVEY - WHISPA

78. If any, where have you received information regarding women's health in high level sport? (please tick all that apply)

- |                                                             |                                                 |
|-------------------------------------------------------------|-------------------------------------------------|
| <input type="checkbox"/> I haven't received any information | <input type="checkbox"/> Fellow athletes        |
| <input type="checkbox"/> Coach                              | <input type="checkbox"/> Websites               |
| <input type="checkbox"/> National Sporting Organisation     | <input type="checkbox"/> Social Media           |
| <input type="checkbox"/> Medical Director for my sport      | <input type="checkbox"/> Sports Physician       |
| <input type="checkbox"/> General Practitioner/Sports Doctor | <input type="checkbox"/> Sports physiotherapist |
| <input type="checkbox"/> Endocrinologist/Gynaecologist      | <input type="checkbox"/> My own research        |
| <input type="checkbox"/> Books                              |                                                 |
| <input type="checkbox"/> Other (please specify)             |                                                 |

79. How useful do you feel this information has been for you?

Very unhelpful (inaccurate or contradictory information) Very helpful

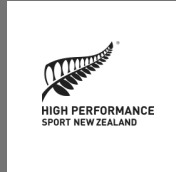

ATHLETE WINS SURVEY - WHISPA

THANK YOU FOR COMPLETING AND PARTICIPATING IN THIS SURVEY

**We are really grateful to you for completing this survey.**

**If you have any concerns, questions, or feel you need to speak to someone please contact one of the investigators of this survey, your National Sporting Organisation Medical Director, or your General Practitioner.**
